# Supplementary material
Source: publisher figshare collection journal article supplement (https://frontiersin.figshare.com/ndownloader/files/12524084)
Supplement: Supplementary file [file 12524084]

# **Tuning the catalytic activity of Ir@Pt nanoparticles through controlling Ir core size on cathode performance for PEM fuel cell application**

*Hao-Bo Zheng<sup>a</sup>, Lu An<sup>a</sup>, Yuying Zheng<sup>a</sup>, Chong Qu<sup>b</sup>, Yanxiong Fang<sup>a</sup>, Quanbing Liu<sup>a\*</sup>, Dai Dang<sup>a\*</sup>*

<sup>a</sup> School of Chemical Engineering and Light Industry, Guangdong University of Technology, Guangzhou, Guangdong, 510006, China

<sup>b</sup> Department of Materials Science and Engineering College of Engineering, Peking University, Beijing 100871, China

\*Corresponding author:

Quanbing Liu, School of Chemical Engineering and Light Industry, Guangdong University of Technology, Guangzhou 510006, China

Dai Dang, School of Chemical Engineering and Light Industry, Guangdong University of Technology, Guangzhou 510006, China

Tel: +86-20-39322812

E-mail: liuqb@gdut.edu.cn; dangdai@gdut.edu.cn

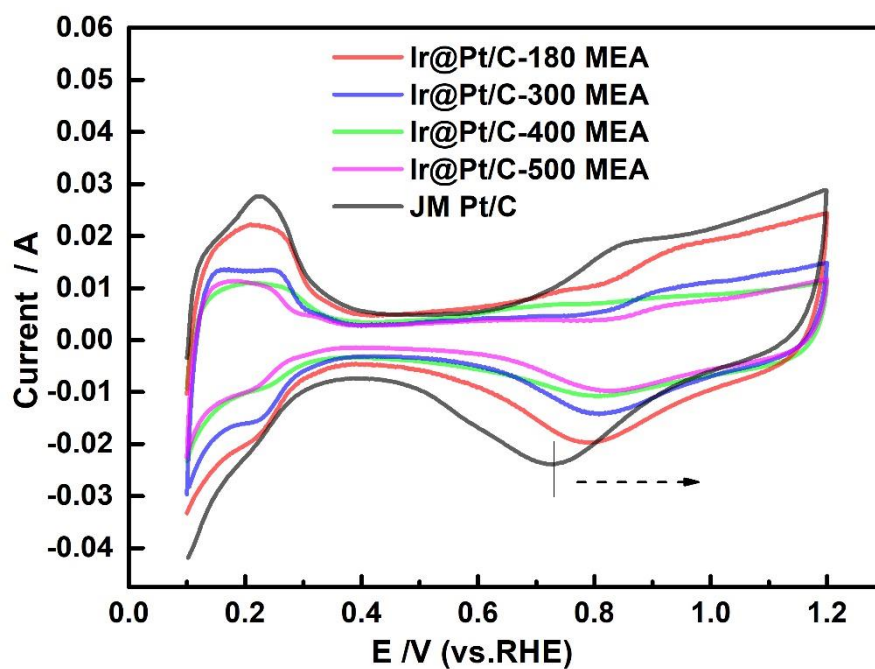

**Figure. S1** Cyclic voltammograms of the MEAs with different cathodes. The experiments were conducted in a single cell at room temperature, using humidified  $N_2$  at the cathode (working electrode) and humidified  $H_2$  at the anode (counter electrode cum reference electrode). Scan rate:  $50 \text{ mV s}^{-1}$

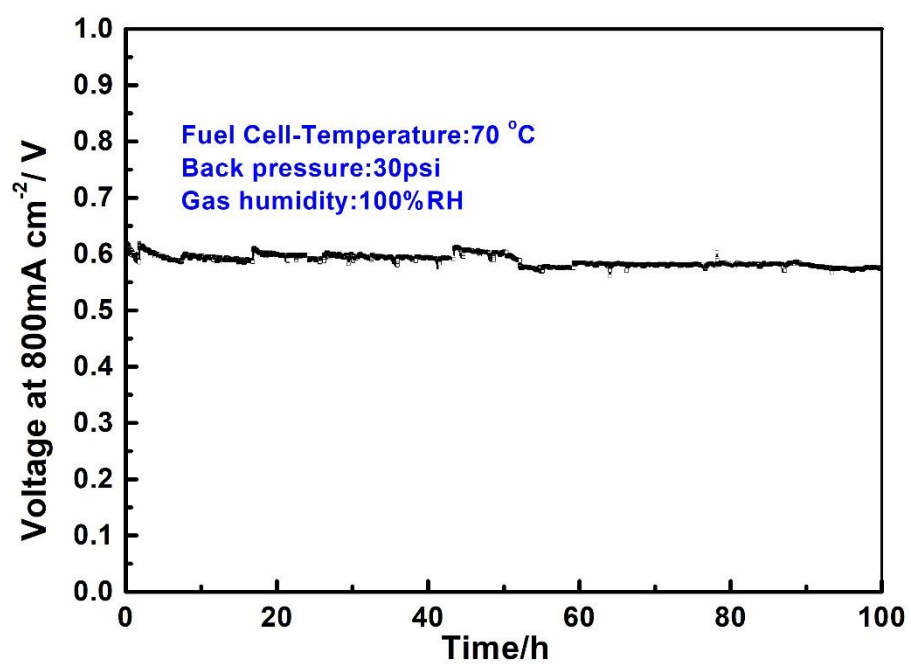

**Figure. S2** Preliminary stability test of the Ir@Pt/C-300 MEA at 800 mA cm<sup>-2</sup> for 100 h
